# Supplementary material
Source: HighWire-hosted journal article supplement (https://erj.ersjournals.com/highwire/filestream/113850/field_highwire_adjunct_files/0/Online_supplement_version_2.pdf)
Supplement: Online_supplement_version_2.pdf [file Online_supplement_version_2.pdf]

ONLINE SUPPLEMENT:

**Table 4a.** Performance characteristics of all action points based solely on Symptoms.

The action point ‘nocturnal awakening’ was considered positive whenever a patient had awoken due to asthma symptoms; ‘appearance of any symptoms’ was positive whenever a patient had experienced any breakthrough symptoms; ‘severe symptoms’ whenever the composite symptom score was two or more, or yes in case of nocturnal awakening. The action points based on SD are positive whenever the result of a composite symptom score was higher than respectively 1, 2, or 3 standard deviations from a mean symptom score calculated from data obtained during the run in period.

| <i>Action point criteria</i>      | Definition exacerbation | Early diagnosis (days) | Sensitivity (%) | Specificity (%) | Accuracy (%) | AUC  | NNT |
|-----------------------------------|-------------------------|------------------------|-----------------|-----------------|--------------|------|-----|
| <i>Nocturnal awakening</i>        | Symptoms PEFs           | 2.5                    | 83.9            | 86.3            | 86.3         | 0.85 | 26  |
|                                   | Use of prednisone       | 2.6                    | 77.6            | 86.7            | 86.6         | 0.82 | 16  |
| <i>Appearance of any symptoms</i> | Symptoms PEFs           | 5.4                    | 100             | 42.0            | 42.4         | 0.71 | 94  |
|                                   | Use of prednisone       | 5.2                    | 97.7            | 42.3            | 42.9         | 0.70 | 57  |
| <i>Severe symptoms</i>            | Symptoms PEFs           | 3.0                    | 90.8            | 79.5            | 79.6         | 0.85 | 36  |
|                                   | Use of prednisone       | 3.2                    | 91.2            | 79.9            | 80.0         | 0.86 | 21  |
| <i>Symptom</i>                    | Symptoms PEFs           | 3.6                    | 95.4            | 77.3            | 77.4         | 0.86 | 38  |

|                              |                   |     |      |      |      |      |    |
|------------------------------|-------------------|-----|------|------|------|------|----|
| <i>score &gt;1SD</i>         | Use of prednisone | 3.4 | 91.8 | 77.7 | 77.8 | 0.85 | 23 |
| <i>Symptom score &gt;2SD</i> | Symptoms PEFs     | 2.9 | 88.5 | 86.3 | 86.3 | 0.87 | 24 |
|                              | Use of prednisone | 2.7 | 76.9 | 86.6 | 86.5 | 0.82 | 17 |
| <i>Symptom score &gt;3SD</i> | Symptoms PEFs     | 2.7 | 74.7 | 90.9 | 90.8 | 0.83 | 19 |
|                              | Use of prednisone | 2.6 | 61.9 | 91.1 | 90.8 | 0.77 | 14 |

**Table 4b.** Performance characteristics of action points based solely on Peak Flow.

‘PEF 2 days 85% of personal best’ was considered positive whenever PEF was lower than 85% of the personal best PEF on two consecutive days; ‘PEF % of personal best’ whenever PEF was lower than the designated percentage of that patients personal best PEF score; ‘PEF SD’ whenever PEF was lower than respectively 1, 2, or 3 standard deviations from the mean PEF obtained during the run in period.

| <i>Action point criteria</i>            | Definition of exacerbation | Early diagnosis (days) | Sensitivity (%) | Specificity (%) | Accuracy (%) | AUC  | NNT |
|-----------------------------------------|----------------------------|------------------------|-----------------|-----------------|--------------|------|-----|
| <i>PEF 85% pb on 2 consecutive days</i> | Symptoms PEFs              | 4.4                    | 87.4            | 78.8            | 78.8         | 0.83 | 38  |
|                                         | Use of prednisone          | 3.7                    | 82.3            | 79.0            | 79.1         | 0.81 | 24  |
| <i>PEF &lt;80% pb</i>                   | Symptoms PEFs              | 4.4                    | 94.3            | 80.4            | 80.5         | 0.87 | 33  |
|                                         | Use of prednisone          | 3.5                    | 87.1            | 80.6            | 80.7         | 0.84 | 21  |
| <i>PEF &lt;70% pb</i>                   | Symptoms PEFs              | 2.9                    | 90.8            | 93.9            | 93.9         | 0.92 | 11  |
|                                         | Use of prednisone          | 2.6                    | 61.2            | 93.9            | 93.5         | 0.78 | 10  |
| <i>PEF &lt;60% pb</i>                   | Symptoms PEFs              | 1.0                    | 78.2            | 98.7            | 98.6         | 0.88 | 3   |
|                                         | Use of prednisone          | 1.2                    | 38.1            | 98.7            | 98.0         | 0.68 | 4   |
| <i>PEF &lt;1SD †</i>                    | Symptoms PEFs              | 4.4                    | 95.4            | 71.3            | 71.4         | 0.83 | 49  |

|                      |                   |     |      |      |      |      |    |
|----------------------|-------------------|-----|------|------|------|------|----|
|                      | Use of prednisone | 3.7 | 87.1 | 71.5 | 71.6 | 0.79 | 32 |
| <i>PEF &lt;2SD †</i> | Symptoms PEFs     | 3.3 | 89.7 | 85.3 | 85.3 | 0.87 | 26 |
|                      | Use of prednisone | 2.5 | 76.9 | 85.5 | 85.4 | 0.81 | 18 |
| <i>PEF &lt;3SD †</i> | Symptoms PEFs     | 2.7 | 70.1 | 92.6 | 92.5 | 0.81 | 17 |
|                      | Use of prednisone | 2.6 | 54.4 | 92.8 | 92.3 | 0.74 | 13 |

**Table 4c.** Performance characteristics of all action points that combined thresholds for both Symptoms and PEF, where *both* thresholds were reached on the same day. For example ‘symptoms 1SD and PEF 80%’ was positive whenever the composite symptom score was higher than 1 standard deviation from the mean symptom score *and* PEF was lower than 80% of that patients personal best. For a further description see table 4a and 4b.

| <i>Action point criteria</i>               | Definition of exacerbation | Early diagnosis (days) | Sensitivity (%) | Specificity (%) | Accuracy (%) | AUC  | NNT |
|--------------------------------------------|----------------------------|------------------------|-----------------|-----------------|--------------|------|-----|
| <i>Symptoms &gt;1SD and PEF &lt;80% pb</i> | Symptoms PEFs              | 2.6                    | 89.7            | 92.1            | 92.1         | 0.91 | 14  |
|                                            | Use of prednisone          | 2.3                    | 77.6            | 92.4            | 92.2         | 0.85 | 10  |
| <i>Symptoms &gt;2SD and PEF &lt;70% pb</i> | Symptoms PEFs              | 1.4                    | 80.5            | 98.3            | 98.2         | 0.89 | 4   |
|                                            | Use of prednisone          | 1.4                    | 47.6            | 98.3            | 97.7         | 0.72 | 4   |
| <i>Symptoms &gt;2SD and PEF &lt;60% pb</i> | Symptoms PEFs              | 0.3                    | 67.8            | 99.6            | 99.4         | 0.84 | 2   |
|                                            | Use of prednisone          | 0.5                    | 30.6            | 99.5            | 98.7         | 0.65 | 2   |

|                                                         |                   |     |      |      |      |      |    |
|---------------------------------------------------------|-------------------|-----|------|------|------|------|----|
| <i>Symptoms &gt;3SD and PEF 60% pb</i>                  | Symptoms PEFs     | 0.3 | 55.2 | 99.8 | 99.5 | 0.77 | 2  |
|                                                         | Use of prednisone | 0.5 | 23.1 | 99.7 | 98.8 | 0.61 | 2  |
| <i>Appearance of symptoms and PEF &lt;80% (NAEPP)</i>   | Symptoms PEFs     | 3.9 | 94.3 | 83.3 | 83.4 | 0.89 | 28 |
|                                                         | Use of prednisone | 3.1 | 85.0 | 83.5 | 83.6 | 0.84 | 18 |
| <i>Appearance of symptoms and PEF &lt;70% pb</i>        | Symptoms PEFs     | 2.7 | 90.8 | 94.4 | 94.4 | 0.93 | 10 |
|                                                         | Use of prednisone | 2.4 | 60.5 | 94.4 | 94.1 | 0.78 | 9  |
| <i>Appearance of severe symptoms and PEF &lt;70% pb</i> | Symptoms PEFs     | 1.6 | 81.6 | 97.4 | 97.3 | 0.90 | 6  |
|                                                         | Use of prednisone | 1.6 | 51.0 | 97.5 | 97.0 | 0.74 | 5  |
| <i>Nocturnal awakening and PEF &lt;70% pb</i>           | Symptoms PEFs     | 1.3 | 75.9 | 98.1 | 97.9 | 0.87 | 5  |
|                                                         | Use of prednisone | 1.2 | 44.2 | 98.1 | 97.5 | 0.71 | 5  |

|                                         |                   |     |      |      |      |      |    |
|-----------------------------------------|-------------------|-----|------|------|------|------|----|
| <i>Symptoms &gt;1SD and PEF &gt;1SD</i> | Symptoms PEFs     | 2.6 | 92.0 | 89.0 | 89.0 | 0.90 | 19 |
|                                         | Use of prednisone | 2.7 | 75.5 | 89.2 | 89.1 | 0.82 | 14 |
| <i>Symptoms &gt;2SD and PEF &gt;2SD</i> | Symptoms PEFs     | 1.8 | 81.6 | 95.5 | 95.4 | 0.89 | 9  |
|                                         | Use of prednisone | 1.8 | 60.5 | 95.6 | 95.2 | 0.78 | 7  |
| <i>Symptoms &gt;3SD and PEF &gt;3SD</i> | Symptoms PEFs     | 1.7 | 56.3 | 97.9 | 97.7 | 0.77 | 6  |
|                                         | Use of prednisone | 2.1 | 41.5 | 98.0 | 97.4 | 0.70 | 5  |

**Table 4d.** Performance characteristics of action points that used a Time Window for thresholds of Symptoms and PEF. For example ‘7 day timeframe 2SD symptoms, 70% personal best PEF’ was positive whenever the composite symptom score was higher than two standard deviations above the mean symptom score on a certain day and the PEF result was lower than 70% of that patients personal best PEF on that day, or on any of the preceding or following seven days.

| <b>TIME WINDOW</b>                                         |                            |                        |                 |                 |              |      |     |
|------------------------------------------------------------|----------------------------|------------------------|-----------------|-----------------|--------------|------|-----|
| <i>Action point criteria</i>                               | Definition of exacerbation | Early diagnosis (days) | Sensitivity (%) | Specificity (%) | Accuracy (%) | AUC  | NNT |
| <i>3 day timeframe<br/>Symptoms 2SD<br/>PEF &lt;70% pb</i> | Symptoms PEFs              | 3.4                    | 81.6            | 97.7            | 97.6         | 0.90 | 5   |
|                                                            | Use of prednisone          | 2.6                    | 51.0            | 97.6            | 97.1         | 0.74 | 5   |
| <i>7 day timeframe<br/>Symptoms 2SD<br/>PEF &lt;70% pb</i> | Symptoms PEFs              | 4.1                    | 85.1            | 97.2            | 97.1         | 0.91 | 6   |
|                                                            | Use of prednisone          | 3.5                    | 54.4            | 97.2            | 96.7         | 0.76 | 5   |



**Table 5a.** Symptom score used in developmental dataset [8]. Each symptom was scored between 0 and 1. Zero meant that symptom was not experienced, and 1 was the maximum score for that symptom. For symptoms scored between 0-3, i.e. chest tightness, we adjusted results (0=0, 1=0.33, 2=0.66, 3=1). B2-usage was scored as 0 when no ‘reliever’ medication was used; 0.16 for 1 or 2 puffs; 0.33 for 3 or 4; 0.5 for 5-8; 0.66 for 9-12; 0.83 for 13-16; and 1 for >16 uses of reliever medication per day. Nocturnal awakening scored 0 if it had not occurred that day and 1 if the patient had awoken due to symptoms.

| Symptom                             | Score |
|-------------------------------------|-------|
| Morning and evening chest tightness | 0-1   |
| Morning and evening cough           | 0-1   |
| Nocturnal awakening                 | 0-1   |
| Sputum production                   | 0-1   |
| Exercise limitations                | 0-1   |
| B2-usage                            | 0-1   |
| Total daily composite symptom score | 0-6   |

**Table 5b.** Symptom score in the validation dataset [9]. Symptoms were scored between 0 - 5. 0 = no symptoms, 1 = symptoms for one short period, 2 = symptoms for two or more short periods, 3 = symptoms most of the time that did not affect normal daily activities, 4 = symptoms most of the time that did affect normal daily activities, and 5 = symptoms so severe as to disrupt daily activities. This score between 0 and 5 was recalculated between 0-3 (i.e. 0=0, 1=0.6, 2=1.2, 3=1.8, 4=2.4, 5=3). Nocturnal awakening and B2-usage were scored similarly as in the development dataset (see description Table 5a).

| Symptom                             | Score |
|-------------------------------------|-------|
| Limitations and symptoms            | 0-3   |
| Nocturnal awakening                 | 0-1   |
| B2-usage                            | 0-1   |
| Total daily composite symptom score | 0-5   |
